# Supplementary material
Source: publisher figshare collection journal article supplement (https://karger.figshare.com/ndownloader/files/20546484)
Supplement: Supplementary file 1 [file 20546484]

## Sheet: Foglio1
Domestication (Benítez-Burraco et al., 2017 + Theofanopoulou et al., 2017)	Neural crest (Benítez-Burraco et al., 2017)	Genes differentially expressed in the blood of subjects with ASD
ABAT	ALX1	ABCG1
ABCA10	ALX3	ABRACL
ABCA5	ALX4	ACRBP
ABCB10	ASCL1	ACVRL1
ABCG1	BDNF	ADAM21
ABCG2	BMP2	AGR3
ABHD1	BMP4	AIG1
ACA64	BMP7	AKAP14
ACAD8	CAD7	ALDH16A1
ACMSD	CDH2	ALDH1L2
ACOT11	CDH6	ANK2
ACOT13	CMYC	ANKRD10
ACOT8	COL1A2	ANKUB1
ACOX2	COL2A1	AOC3
ACOX3	CRKL	APITD1
ACSF3	DCT	APOBR
ACSM5	DLX5	ARHGAP20
ACSS2	DLX6	ARHGEF40
ACTA1	EDN1	ARPP21
ADAM2	EDN3	ASGR1
ADAMDEC1	EDNRA	ATP6V0C
ADAMTS13	EDNRB	B3GNT2
ADAMTSL3	EFNB1	BAAT
ADRB2	EFNB2	BAMBI
AHCY	ETS1	BMP2K
AHCYL2	FGF2	BMP6
AK1	FGF8	BTG3
AKAP1	FOXD3	C11orf58
ALDH16A1	GBX2	C15orf39
ALDH18A1	GDNF	CACNG6
ALDH1L2	GFAP	CAP2
ALK	GJB1	CASP7
ALS2CR12	GLI3	CBX1
AMACR	GSC	CBX3
AMBRA1	HDAC	CCDC14
ANK1	HES1	CCDC27
ANKDD1A	HES5	CCDC65
ANKRD2	HOXA1	CCNT2
ANKRD49	HOXA2	CD160
ANKRD50	HOXA3	CD248
ANKS4B	HOXB1	CD38
APEH	ID3	CES4A
APOBEC4	ISL1	CHRNB2
APOPT1	ITGB1	CHURC1
ARHGAP26	KIF1B	CKLF
ARID1B	LHX1	CLEC4D
ARID3B	LHX2	CLEC9A
ARL6IP1	MASH1	CLRN2
ARL9	MAX	CMC1
ART3	MITF	CMTR2
ASAP1	MSX1	CNN1
ASB11	MSX2	CPA3
ASIP	NEUROD	CPNE9
ASTN1	NEUROG1	CXorf57
ASTN2	NF1	CYP4V2
ATL1	NFKB	CYTL1
ATXN7L1	NOTCH	DDIT4L
B3GALTL	NRP1	DEPDC4
B3GLCT	NRP2	DHX34
BAG5	OLIG1	DIO2
BARD1	OLIG2	DNAJB5
BAZ1B	PAX3	DSC1
BCAP31	PAX7	DSEL
BMP15	PHOX2B	DUX4
BMPR1B	PHOX2B	ECSCR
BPI	PMP22	EFCAB7
BRAF	POMT1	EMB
BRCA1	RET	ERAP2
BTAF1	RHOB	FABP2
C11orf54	ROBO1	FAM124A
C11orf63	ROBO2	FAM194A
C15orf60	SDHB	FAM26D
C16orf71	SDHD	FAM60A
C17orf67	SNAIL1	FBXL13
C1orf109	SNAIL2	FHIT
C22orf31	SOX10	FOXD4
C2orf40	SOX5	FOXO4
C2orf62	SOX9	FRG1
C3orf62	TBX1	GAS2L1
C4orf33	TFAP2A	GFI1B
C5orf15	TMEM127	GHRL
C7orf72	TWIST	GNLY
C8B	VHL	GOLGA6L6
C9orf89	WNT1	GOPC
C9orf96	WNT3a	GPR171
CACNA1C	WNT6	GPR180
CACNA1D	WNT7B	GUCY1A3
CADM2	WNT8	H1F0
CAGE1	ZEB2	HCN1
CALCB	ZIC1	HDC
CASP7		HDGF
CAST		HEXIM2
CAV1		HIATL1
CAV2		HIC1
CBD118		HIST1H2AC
CBD121		HIST1H2AD
CBD122		HIST1H2AE
CBX2		HIST1H2BJ
CCDC38		HLA-DRA
CCDC64B		HOPX
CCDC67		HOXC6
CCDC70		HOXD13
CCDC82		HRASLS
CCNJ		IFT81
CCNT2		IGF1
CD27		ITGB4
CD36		ITLN1
CD48		JAKMIP1
CD93		JPH3
CDH1		KBTBD8
CDH6		KCNJ10
CDK5RAP1		KIAA1045
CDKL3		KIAA1671
CDRT1		KIF24
CDRT4		KLHDC9
CELA1		KLRB1
CENPE		KLRC1
CENPM		KLRC3
CEP68		KLRG1
CEP97		KLRK1
CERS3		KRT72
CETN3		KRTAP19-2
CHD7		LEFTY1
CHMP4B		LGALS12
CIB4		LIN28B
CKB		LOC402160
CKM		LRIT3
CLCA3		LRRCC1
CLDN17		LRRD1
CLEC5A		LYAR
CLK3		MAP2K3
CNGA2		MAST3
CNTN6		MED25
COA5		MFN2
COBL		MGAT3
COG6		MLH3
COIL		MLLT4
COL11A1		MMP8
COL14A1		MRPL33
COL22A1		MS4A2
COL6A3		MTURN
COL9A3		MYBL1
COMMD1		MYO5A
COQ10B		MYOM2
COX4I1		NAP1L3
COX4I2		NAT8B
CPEB3		NECAB1
CRH		NEURL1
CROCC		NME8
CRTC3		NUDT10
CRYM		ODF3B
C-SKI		OR1N1
CSPP1		OR8I2
CTTN		P2RY12
CUL1		PAX3
CUX2		PDE3A
CXCL10		PDLIM7
CYB5R1		PDPR
CYFIP1		PIGY
CYP1A1		PKIG
CYP1A2		PKP4
CYP26A1		PLA2G7
CYP26C1		PLOD1
CYP27B1		PPIAL4A
DACT1		PRKAR1B
DAPK1		PRKD2
DBI		PRR4
DCC		PRSS36
DCST1		PTPN4
DDC		PTPRU
DEFB103B		PVALB
DEFB119		RAB36
DEFB122		RASL12
DGAT1		REG1A
DHDH		REG4
DLGAP1		RLN1
DLL3		RNASE10
DMRT3		RNASEH2B
DNAH3		RPL15
DNAH9		RPS26
DNAJA1		S100B
DNAJB9		SCARF1
DNTTIP2		SCGB1C1
DOCK2		SCGB1D4
DPEP3		SCNN1B
DSCAM		SEC14L1
DTD1		SEMA4F
DUSP19		SFR1
ECHDC1		SGCE
EDC3		SH3BGRL2
EDN3		SHANK2
EDNRB		SIGLEC10
EEA1		SIRPB2
EHBP1L1		SLC16A3
EIF2S2		SLC22A24
ELF2		SLC25A20
EMC2		SLC4A4
ENKUR		SPATA12
ENTPD1		SPZ1
ENTPD7		SRP9
EPHB4		ST6GALNAC2
EPS15		SYCP2
ERBB4		TAL1
ETNPPL		TBC1D12
ETV4		TC2N
EVC2		TFCP2L1
EYA1		TFIP11
F9		TIE1
FABP5		TK1
FAF1		TMCC1
FAIM3		TMEM164
FAM107B		TMEM88
FAM114A2		TMTC3
FAM131B		TNNC2
FAM172A		TOX2
FAM179A		TPD52L1
FAM40B		TREX1
FAM69A		TRIM45
FANCA		TRPA1
FANCB		TRPC1
FAT4		TSC22D1
FBN3		TSPAN16
FBXL22		TWIST2
FBXO10		UBTFL1
FBXO28		UBXN10
FBXO31		UNCX
FBXW10		UTS2B
FBXW11		VIL1
FCHSD2		VSIG4
FCRL4		VWF
FER		WBSCR17
FGA		WNT3
FGD6		XCL1
FGF13		YES1
FGF18		ZBTB33
FGF4		ZER1
FGF5		ZNF185
FGF8		ZNF277
FGFBP3		ZNF32
FHL1		ZNF443
FMO3		ZNF709
FN3K		ZNF728
FOXD3
FOXI1
FOXJ3
FRMD6
FRMD7
FRMPD1
FSTL4
GABRA5
GAK
GALR1
GAPDHS
GCNT7
GDNF
GEMIN7
GGT6
GGT7
GLRA1
GNAT3
GNG10
GNG4
GNPTAB
GOLGA1
GP2
GPATCH8
GPR133
GPR139
GPR15
GPR174
GPRASP2
GPRC5A
GPRC5B
GPRIN2
GRHL3
GRIA1
GRIA2
GRID1
GRIK2
GRIK3
HADH
HAS2
HEATR5B
HECA
HEPACAM2
HEPH
HERC2
HIPK2
HMGA2
HMMR
HOPX
HPS5
HS3ST4
HS6ST2
HSD3B7
HSPA13
HSPD1
HSPE1
HTR4
IFT80
IFT81
IGF1
IGF2
IGHMBP2
IGSF1
IGSF3
IGSF9B
IKZF1
IMMP2L
INHBC
INPP4B
INPP5J
IPO4
IQCB1
ISG15
ITGA2B
ITGA9
ITGBL1
ITPR3
JAM3
JMJD1C
JPH3
JRKL
KCNK10
KDM3A
KDM6B
KDR
KIAA0226
KIAA0556
KIAA1549
KIF1C
KIF22
KIF27
KIRREL2
KIT
KITLG
KLF4
KLHDC4
KRIT1
KRT71
KYNU
LAMC2
LAMC3
LAP3
LATS2
LCAT
LCLAT1
LEPREL1
LHFPL3
LIAS
LILRA6
LIMD1
LIN28B
LINC01927
LINGO2
LMF1
LRIG3
LRP1B
LRRC32
LRRC36
LRRN3
LSM3
LTF
LYST
MAFK
MAGOH
MAOA
MAOB
MAP3K1
MAP3K4
MAP7D2
MAP7D3
MAPK10
MARCH10
MARCH7
MARK2
MARK3
MARVELD3
MATN2
MBD2
MBP
MC1R
MC2R
MC4R
MCF2
MCHR2
MED23
MERTK
METAP2
METTL22
METTL8
MFAP3
MGAM
MGC12345
MIER3
MIF4GD
MIIP
MINOS1
MITF
MKKS
MMP16
MOB4
MORC1
MPV17L
MRPL11
MRPL52
MSI2
MSRB3
MSTN
MT1F
MT1L
MT2A
MTIF2
MTRF1
MURC
MVK
MYBPC1
MYLK3
MYO15A
MYO9A
MYOF
NAPRT1
NCAPD3
NCAPG
NCOA6
NCTIN1
NDUFB1
NEK1
NEK4
NFAM1
NFKBIZ
NID2
NINJ1
NIPA2
NIPBL
NKAIN2
NOCT
NOL4
NOLC1
NOSTRIN
NOTCH2
NPAS3
NPFFR2
NPTX1
NR2F2
NR3C1
NR3C2
NRF1
NRG2
NRG4
NRSA2
NRXN1
NT5DC2
NTAN1
NTM
NUDT15
NUMB
NUP133
NUP54
NXPE3
OLIG1
OMA1
OPCML
OPTC
OR10K1
OR13C8
OR2B11
OR4D6
OR51A7
OR9A4
OTOF
PAFAH2
PARP12
PARVG
PAX2
PAX3
PCDH18
PCDHA1
PCDHB4
PCSK5
PDE4D
PDE4DIP
PDE5A
PDE7B
PDILT
PDRG1
PDXDC1
PEX7
PHF2
PHF20
PHLDB3
PIK3C3
PITRM1
PJA2
PKD1L1
PLA2G2E
PLA2G3
PLAC1
PLAC8L1
PLAG1
PLCE1
PLEKHH1
PLEKHM3
PLIN3
PLXNA4
PMEL
PML
Pol
POLI
POLR1E
POMC
POP1
PPAP2A
PPAPDC1B
PPARD
PPFIBP1
PPM1D
PPP1R13B
PPP2CA
PRICKLE4
PRKAG1
PRKAG3
PRKCZ
PRKG2
PRMT3
PROM1
PRR11
PRX
PSMB7
PSPH
PSTK
PTPN4
PTPRR
PTPRS
PUSL1
PVRL3
Q2ABD2
RAB3GAP1
RABGAP1L
RABL3
RALGAPA2
RALY
RANBP17
RAPH1
RASGEF1B
RBM11
RBP5
RCSD1
REEP1
RELL1
RELT
RET
RFTN2
RG9MTD3
RHBDD1
RHPN1
RIMKLA
RNASE6
RNF103
RNF144B
RNPC3
ROBO1
RPL3
RPL31
RRN3
RRN3P1
RRNRP2
RSL1D1
RSPO2
RTP3
RXFP2
RYR1
S100A12
SAE1
SCARB2
SCN9A
SCP2D1
SCPEP1
SCRIB
SDAD1
SDHAF3
SDK2
SEC24A
SEC63
SEMA3D
SEMA6A
SENP5
SENP7
2010-09-01
SERINC3
SETBP1
SETD9
SETMAR
SF3B1
SGCD
SH2D5
SH3GL2
SHC4
SIAE
SKA2
SKI
SKP1
SLC22A13
SLC22A15
SLC22A18
SLC25A38
SLC35D1
SLC35F5
SLC39A7
SLC39A8
SLC41A2
SLC43A1
SLC46A1
SLC5A1
SLC5A4
SLC6A1
SLC6A17
SLC9A6
SLCO1A2
SMAD2
SMC4
SMG1
SMG6
SMIM23
SMO
SMYD2
SNAP29
SNCG
SNRPD1
SOCS4
SOX10
SOX2
SOX6
SOX9
SPATA19
SPATA21
SPATA7
SPERT
SPHKAP
SPINT1
SPTAN1
SPTBN5
SREBF1
SRP72
SRRM2
STAB1
STARD5
STARD6
STC2
STK10
STK11IP
STS
STX7
STXBP6
SUN3
SURF2
SUSD3
SYNJ2
SYNM
SYTL1
TAOK1
TAS2R1
TAS2R16
TAS2R3
TAS2R38
TBC1D9
TBXAS1
TCOF1
TCTN1
TCTN3
TEKT3
TEX14
TF
TFCP2L1
TH
THBS2
THEGL
THUMPD1
THYN1
TLX3
TMEM114
TMEM132D
TMEM159
TMEM182
TMEM242
TMEM59L
TMEM71
TNFRSF9
TNKS2
TOE1
TP53BP1
TPH1
TRA2B
TRAPPC8
TRBV25OR9-2
TRDN
TRIM16
TRIM59
TRIO
TRMT61A
TRPM1
TRPV6
TRY1
TRY2
TRY3
TSTD2
TTC21B
TTC39A
TUBGCP5
TVP23B
TVP23C
TXN2
TXNRD2
TYK2
TYRP1
U2
UBE2B
UBXN10
ULBP3
UMOD
UNC93A
URB2
USP45
UVRAG
V1R
VDAC1
VEZT
VPS26B
VRK1
VWC2
VWDE
WASF3
WDR17
WDR62
WDR90
WFDC8
WIPF2
WIPF3
WNK2
WWC1
XCR1
XPBP
XPC
XPO6
YSK4
YWHAH
ZC3H3
ZFAT
ZFYVE19
ZMYND10
ZNF236
ZNF286A
ZNF286B
ZNF436
ZNF492
ZNF516
ZNF521
ZNF555
ZNF622
ZNF679
ZNF780B
ZP2
ZPBP
ZZEF1
